# Supplementary material for: An efficient flexible dye-sensitized solar cell with a photoanode consisting of TiO2 nanoparticle-filled and SrO-coated TiO2 nanotube arrays
Source: Royal Society of Chemistry journal article supplement (doi:10.1039/c0jm00598c), 2010-01-01
Supplement: c0jm00598c.pdf [file c0jm00598c.pdf]

Supplementary Information

Efficient Flexible Dye-Sensitized Solar Cell with a Photoanode Consisting of  
TiO<sub>2</sub> Nanoparticles-Filled and SrO-Coated TiO<sub>2</sub> Nanotube Array

Jian-Ging Chen<sup>a</sup>, Chia-Yuan Chen<sup>b</sup>, Chun-Guey Wu<sup>b,\*</sup>, Chia-Yu Lin<sup>a</sup>, Yi-Hsuan Lai<sup>a</sup>,  
Chun-Chieh Wang<sup>a</sup>, Hsin-Wei Chen<sup>a</sup>, R. Vittal<sup>a</sup>, Kuo-Chuan Ho<sup>a,c,\*</sup>

<sup>a</sup>Department of Chemical Engineering, National Taiwan University, Taipei, Taiwan 10617

<sup>b</sup>Department of Chemistry, National Central University, Chung-Li, Taiwan 32054

<sup>c</sup>Institute of Polymer Science and Engineering, National Taiwan University, Taipei, Taiwan 10617

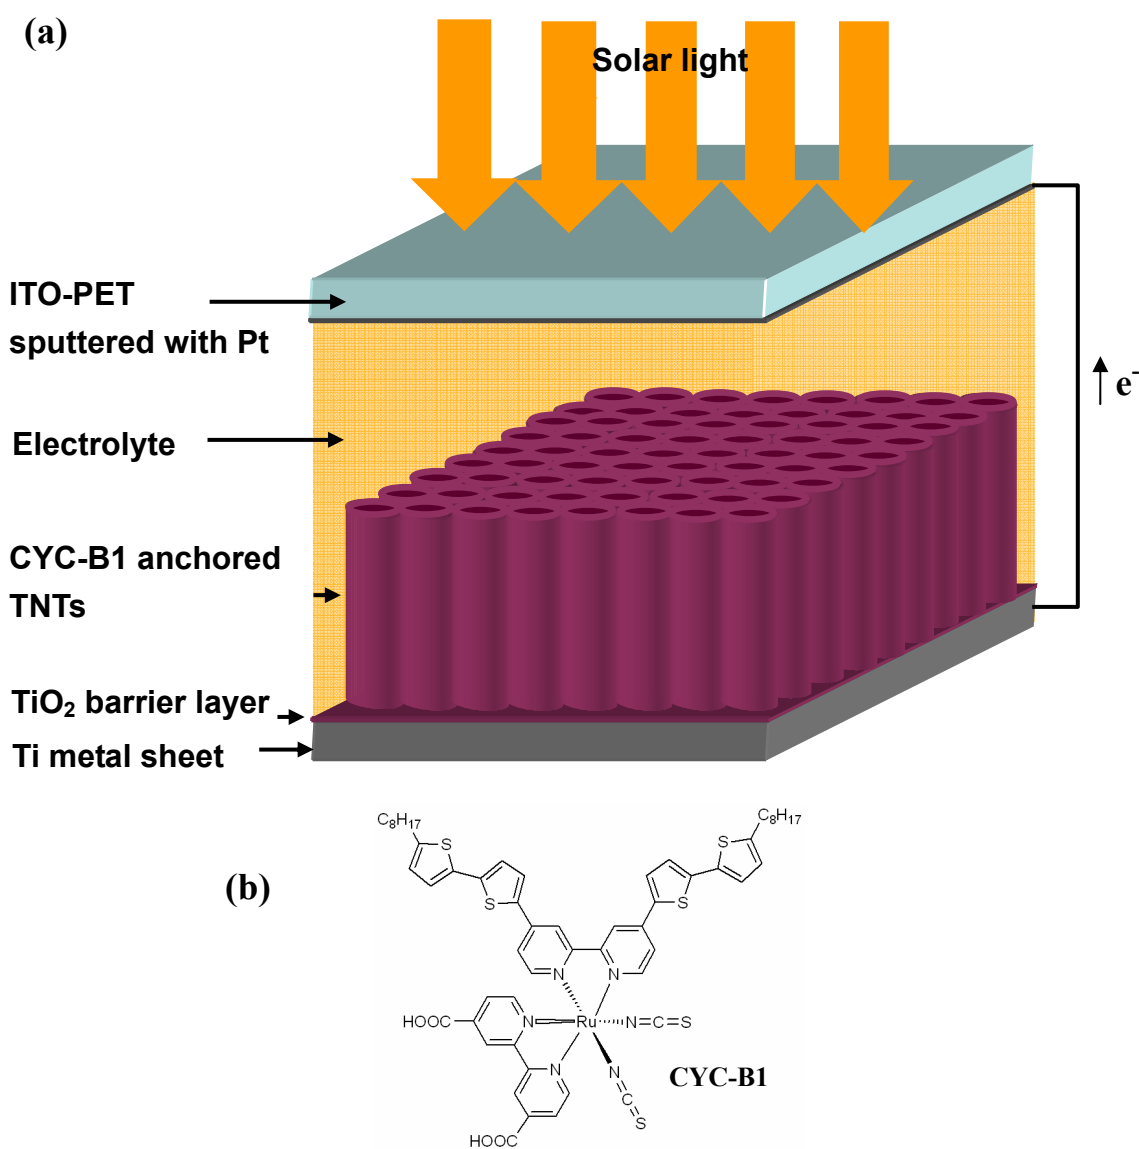

**Figure S1** (a) Schematic diagram of the back-illuminated DSSC with arrays of TNT as the photoanode, (b) chemical structure of CYC-B1 dye.

## Mott-Schottky-plots analysis

The Mott-Schottky-plots analysis predicts a linear relationship between the applied potential and the inverse square of capacitance ( $1/C_{sc}^2$ ) arising from the space charge layer in a semiconductor.<sup>1</sup> Under biasing conditions where the semiconductor space charge region is in depletion, capacitance of the space charge region can be obtained by the following equation,

$$\frac{1}{C_{sc}^2} = \frac{2}{e\epsilon_0\epsilon N_d} \left( -\Delta\phi - \frac{kT}{e} \right) \quad (1)$$

here  $e$  is electronic charge ( $1.6 \times 10^{-19}$  C),  $\epsilon_0$  is the permittivity of free space ( $8.86 \times 10^{-12}$  F/m),  $\epsilon$  is the dielectric constant of the  $\text{TiO}_2$ ,  $N_d$  is dopant (donor or acceptor) concentration,  $-\Delta\phi$  is the difference between the applied potential and the flat-band potential ( $E - E_{fb}$ ),  $k$  is the Boltzmann constant, and  $T$  is the absolute temperature.<sup>2</sup>

Considering the fact that the term of  $kT/e$  is 0.026 eV at room temperature, which was insufficient to influence the original value, equation (1) may be briefly rewritten as follow,

$$\frac{1}{C_{sc}^2} = \frac{2}{e\epsilon_0\epsilon N_d} (E - E_{fb}) \quad (2)$$

The slope of  $C_{sc}^2$  vs.  $\Delta\phi$  is inversely proportional to the effective donor or acceptor concentration in the semiconductor, and the flat-band potential can be determined by extrapolating  $C_{sc}^2$  to 0.<sup>3</sup> The flat-band potentials of TNT, TNT-TNP, and TNT-TNP-SrO electrode estimated from Fig. 9 (in the article), were -0.69, -0.69 and -0.73 V vs. Ag/AgCl (in saturated KCl), respectively. The data shown that the  $V_{fb}$  of the TNT-TNP-SrO electrode is more negative to those of the other two electrodes by 0.04 V.  $\text{TiO}_2$  coated with a layer of wide-band gap material, i.e., SrO, built an inherent potential barrier layer to block electron transfer from the conduction band or trap sites of the  $\text{TiO}_2$  to the triiodide ions of the redox electrolyte. This barrier layer enabled TNT-TNP-SrO-DSSC to have a higher  $V_{oc}$  than those of TNT-DSSC and TNT-TNP-DSSC. Using equation (2) with a linear fitting method and the physical constants of the  $\text{TiO}_2$  material, the donor concentrations of TNT, TNT-TNP, and TNT-TNP-SrO electrodes were calculated to be  $1.06 \times 10^{16}$ ,  $1.38 \times 10^{16}$ , and  $2.21 \times 10^{16}$   $\text{cm}^{-3}$ , respectively. The potential barrier of SrO retards the recombination of photo-injected electrons with  $\text{I}_3^-$  ions and thereby increases the electron concentration in  $\text{TiO}_2$ , which also contributes for a higher  $J_{sc}$  as observed in Fig. 7 (in the article). Benefited by a higher  $V_{oc}$ ,  $J_{sc}$ , and FF, the TNT-TNP-SrO-DSSC showed the highest  $\eta$  amongst the three types of DSSC studied in this article.

## Reference

- (1) E. Barsoukov, J. R. Macdonald, *Impedance Spectroscopy Theory, Experiment, and Applications*; Wiley: NJ, **2005**; Chapter 4.
- (2) G. Wang, Q. Wang, W. Lu, J. Li, *J. Phys. Chem. B*, 2006, **110**, 22029.
- (3) F. Fabregat-Santiago, G. Garcia-Belmonte, J. Bisquert, P. Bogdanoff, A. Zaban, *J. Electrochem. Soc.*, 2003, **150**, E293.
